# Supplementary material for: The HIP2~Ubiquitin Conjugate Forms a Non-Compact Monomeric Thioester during Di-Ubiquitin Synthesis
Source: PubMed Central journal article supplement (PMC4370575; doi:10.1371/journal.pone.0120318), 2015-03-23
Supplement: pone.0120318.s001.pdf [file pone.0120318.s001.pdf]

A

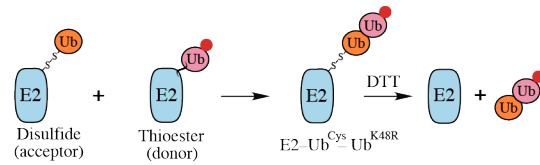

B

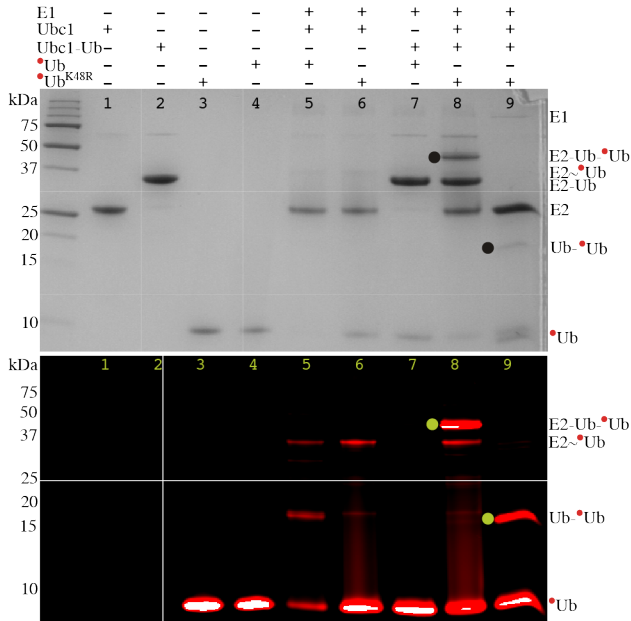

**Figure S1. Ubc1 activity gels showing ubiquitin transfer from the Alexa-680 labeled Ubc1~Ub<sup>K48R</sup> thioester onto the Ubc1-Ub<sup>Cys</sup> disulfide.** (A) Mechanism detailing Ubc1~Ub<sup>K48R</sup> thioester reaction with the Ubc1-Ub<sup>Cys</sup> disulfide to produce Ubc1-Ub<sup>Cys</sup>-Ub<sup>K48R</sup> (Ubc1-Ub<sub>2</sub>). (B) Ubc1 enzyme reactions performed with Alexa-labeled Ub and Ub<sup>K48R</sup> were visualized with Coomassie (top) or 700 nm fluorescence (bottom). Reactions were conducted as described in the text for 4 h at 37 °C. Reducing agent was only added to lane 9 (10 mM DTT and 10 mM TCEP) to break the disulfide linkage. Reaction products are indicated by the filled black / yellow circles. Molecular weight standards and protein species are listed to the left and right of each gel respectively.
