# Supplementary material for: The HIP2~Ubiquitin Conjugate Forms a Non-Compact Monomeric Thioester during Di-Ubiquitin Synthesis
Source: PubMed Central journal article supplement (PMC4370575; doi:10.1371/journal.pone.0120318), 2015-03-23
Supplement: pone.0120318.s003.pdf [file pone.0120318.s003.pdf]

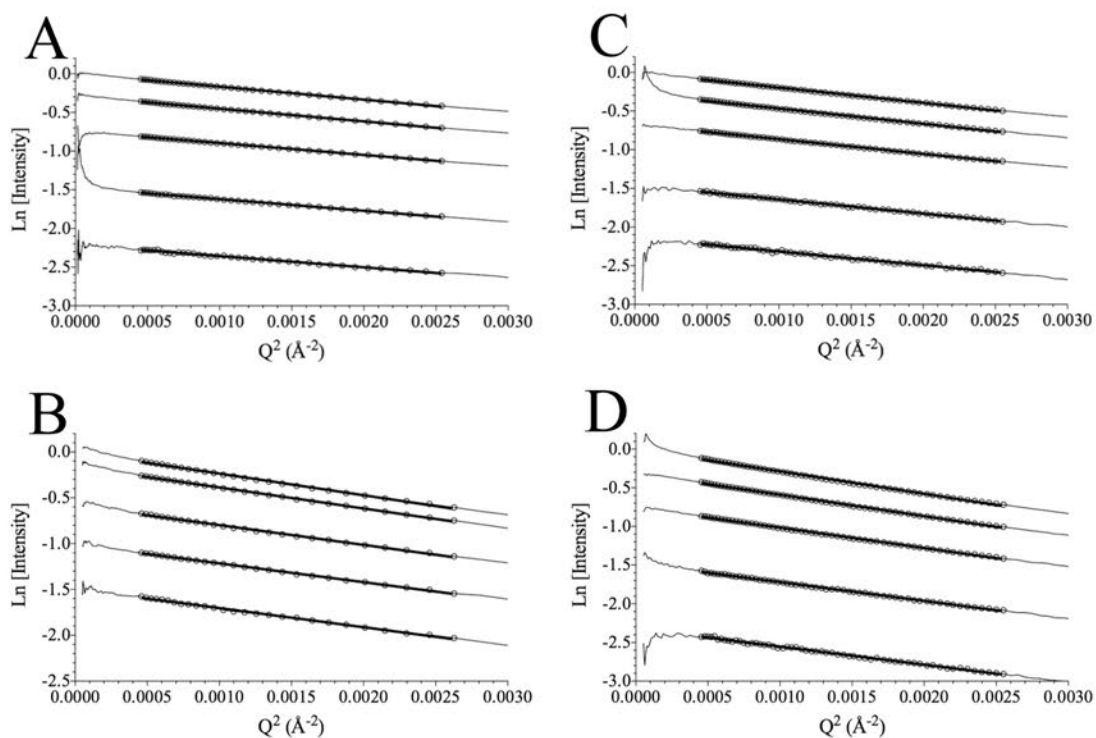

**Figure S3. SAXS data displayed using Guinier plots.** Data is presented for (A) HIP2 at 284, 213, 142, 71 and 36  $\mu\text{M}$ , (B) HIP2-Ub<sup>Cys</sup> at 218, 175, 131, 87 and 43  $\mu\text{M}$ , (C) Ubc1 at 235, 176, 118, 58 and 29  $\mu\text{M}$  and (D) Ubc1-Ub<sup>Cys</sup> at 197, 148, 98, 49 and 24  $\mu\text{M}$ . All data is normalized to the most concentrated data set in the series and plotted using a similar angular range ( $Q^2$ ). Each data set (open circles) was fit to over the linear region to determine the forward scattering ( $I_0$ ) and radius of gyration ( $R_g$ ) reported in Table S1.
