# Supplementary material for: The HIP2~Ubiquitin Conjugate Forms a Non-Compact Monomeric Thioester during Di-Ubiquitin Synthesis
Source: PubMed Central journal article supplement (PMC4370575; doi:10.1371/journal.pone.0120318), 2015-03-23
Supplement: pone.0120318.s006.pdf [file pone.0120318.s006.pdf]

**Table S1. Small angle x-ray scattering results for Ubc1, HIP2 and their covalent ubiquitin complexes**

| Protein                | Conc. ( $\mu\text{M}$ ) | $R_g$ (Å)      | $MW_{\text{Obs}}^{\text{a,b}}$ (kDa) | $MW_{\text{Exp}}$ (kDa) |
|------------------------|-------------------------|----------------|--------------------------------------|-------------------------|
| Ubc1                   | 29                      | 23.1           | 28.3                                 | 24.2                    |
|                        | 58                      | 23.4           | 27.8                                 | 24.2                    |
|                        | 118                     | 23.8           | 30.5                                 | 24.2                    |
|                        | 176                     | 24.3           | 30.5                                 | 24.2                    |
|                        | 235                     | 24.3           | 30.0                                 | 24.2                    |
| Ubc1-Ub <sup>Cys</sup> | 24                      | 26.5           | 31.8                                 | 32.8                    |
|                        | 49                      | 27.0           | 36.9                                 | 32.8                    |
|                        | 98                      | 28.1           | 38.0                                 | 32.8                    |
|                        | 148                     | 28.8           | 39.3                                 | 32.8                    |
|                        | 197                     | 29.5           | 40.4                                 | 32.8                    |
| HIP2                   | 36                      | $20.8 \pm 0.8$ | $24.3 \pm 0.4$                       | 22.5                    |
|                        | 71                      | $21.2 \pm 0.4$ | $25.5 \pm 0.2$                       | 22.5                    |
|                        | 142                     | $21.4 \pm 0.2$ | $26.4 \pm 0.1$                       | 22.5                    |
|                        | 213                     | $22.2 \pm 0.1$ | $27.8 \pm 0.1$                       | 22.5                    |
|                        | 284                     | $22.4 \pm 0.1$ | $27.8 \pm 0.1$                       | 22.5                    |
| HIP2-Ub <sup>Cys</sup> | 43                      | $24.7 \pm 0.2$ | $35.8 \pm 0.2$                       | 31.2                    |
|                        | 87                      | $24.5 \pm 0.1$ | $29.1 \pm 0.1$                       | 31.2                    |
|                        | 131                     | $24.9 \pm 0.1$ | $29.5 \pm 0.1$                       | 31.2                    |
|                        | 175                     | $26.0 \pm 0.1$ | $34.1 \pm 0.1$                       | 31.2                    |
|                        | 218                     | $26.3 \pm 0.1$ | $31.8 \pm 0.1$                       | 31.2                    |

<sup>a</sup>Molecular weight determined by comparison to cytochrome C standard samples

<sup>b</sup>Error analysis for data analyzed by Igor Pro (HIP2 and HIP2-Ub<sup>Cys</sup>). Error analysis based on  $I_0$  errors.
